# Supplementary material for: Cobalt-doped Zn(O,S)/Ga2O3 nanoheterojunction composites for enhanced hydrogen production
Source: Royal Society of Chemistry journal article supplement (doi:10.1039/c7nj05124g), 2018-01-01
Supplement: c7nj05124g1.pdf [file c7nj05124g1.pdf]

## Supplementary Information

### **Cobalt-doped Ga<sub>2</sub>O<sub>3</sub>/Zn(O,S) nanoheterojunction composites for enhanced hydrogen production**

Hairus Abdullah<sup>a,b</sup>, Noto Susanto Gultom<sup>a</sup>, Dong-Hau Kuo<sup>a,\*</sup>, Albert Daniel Saragih<sup>a</sup>

*<sup>a</sup>Department of Materials Science and Engineering, National Taiwan University of Science and Technology, No.43, Sec. 4, Keelung Road, Taipei 10607, Taiwan*

*<sup>b</sup>Department of Industrial Engineering, Universitas Prima Indonesia, Medan, Indonesia*

\*Fax: +011-886-2-27303291. E-mail: [dhkuo@mail.ntust.edu.tw](mailto:dhkuo@mail.ntust.edu.tw)

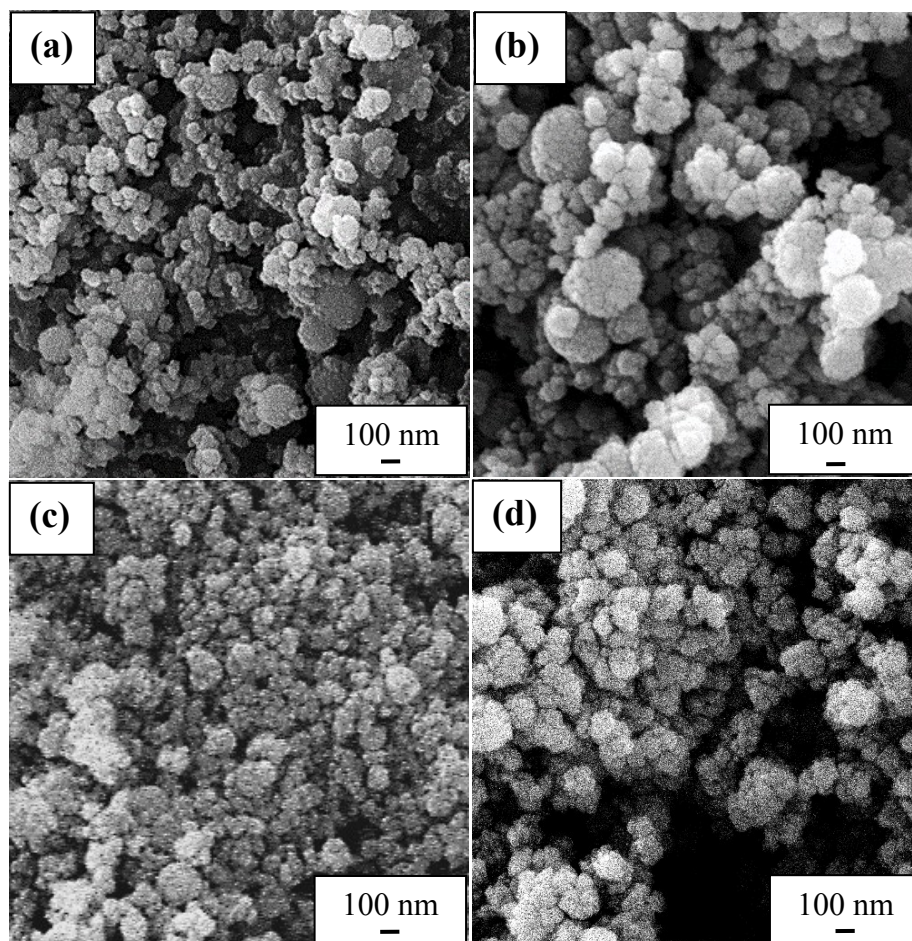

**Fig. S1.** FE-SEM images of (a) 1%, (b) 2.5%, (c) 5%, and (d) 10% Co-doped Zn(O,S)/Ga<sub>2</sub>O<sub>3</sub> nanocomposites
